# Supplementary material for: Design, synthesis and cytotoxic activity of molecular hybrids based on quinolin-8-yloxy and cinnamide hybrids and their apoptosis inducing property
Source: Royal Society of Chemistry journal article supplement (doi:10.1039/d4ra01911c), 2024-01-01
Supplement: d4ra01911c1.pdf [file d4ra01911c1.pdf]

## **Design, Synthesis and Cytotoxic Activity of Molecular Hybrids Based on Quinolin-8-yloxy and Cinnamide Hybrids and Their Apoptosis Inducing Property**

Dalal Nasser Binjawhar <sup>1</sup>, Fawziah A. Al-Salmi <sup>2</sup>, Ola A. Abu Ali <sup>3</sup>, Maha Ali Alghamdi <sup>4</sup>, Eman Fayad <sup>4</sup>, Rasha Mohammed Saleem <sup>5</sup>, Islam Zaki <sup>6,\*</sup> and N. A. Farouk <sup>7</sup>

<sup>1</sup> *Department of Chemistry, College of science, Princee Nourah bint Abdulrahman University, P.O. Box 84428, Riyadh 11671, Saudi Arabia*

<sup>2</sup> *Biology Department, College of Sciences, Taif University, P.O. Box 11099, Taif 21944, Saudi Arabia*

<sup>3</sup> *Department of chemistry, College of Science, Taif University, P.O. Box 11099 Taif 21944, Saudi Arabia*

<sup>4</sup> *Department of Biotechnology, College of Sciences, Taif University, P.O. Box 11099, Taif 21944, Saudi Arabia*

<sup>5</sup> *Department of Laboratory Medicine, Faculty of Applied Medical Sciences, Al-Baha University, Al-Baha- 65431, Saudi Arabia*

<sup>6</sup> *Pharmaceutical Organic Chemistry Department, Faculty of pharmacy, Port Said University, Port Said 42526, Egypt*

<sup>7</sup> *Department of Chemistry, Faculty of Science, Port Said University, Port Said 42526, Egypt*

---

*\* To whome correspondence should be addressed*

Islam Zaki, PhD. Pharmaceutical Organic Chemistry Department, Faculty of pharmacy, Port Said University, Port Said, Egypt.

***E-mail address:*** [Eslam.Zaki@pharm.psu.edu.eg](mailto:Eslam.Zaki@pharm.psu.edu.eg) (I. Zaki)

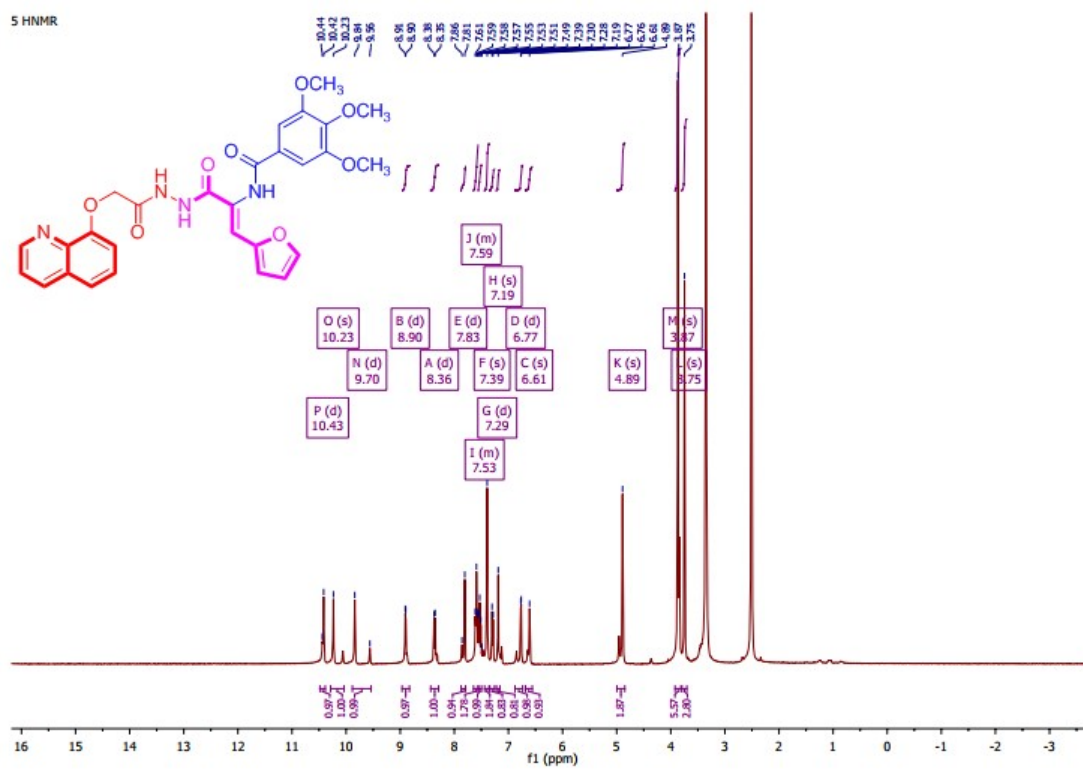

Figure S1:  $^1\text{H}$ -NMR spectrum of compound 5

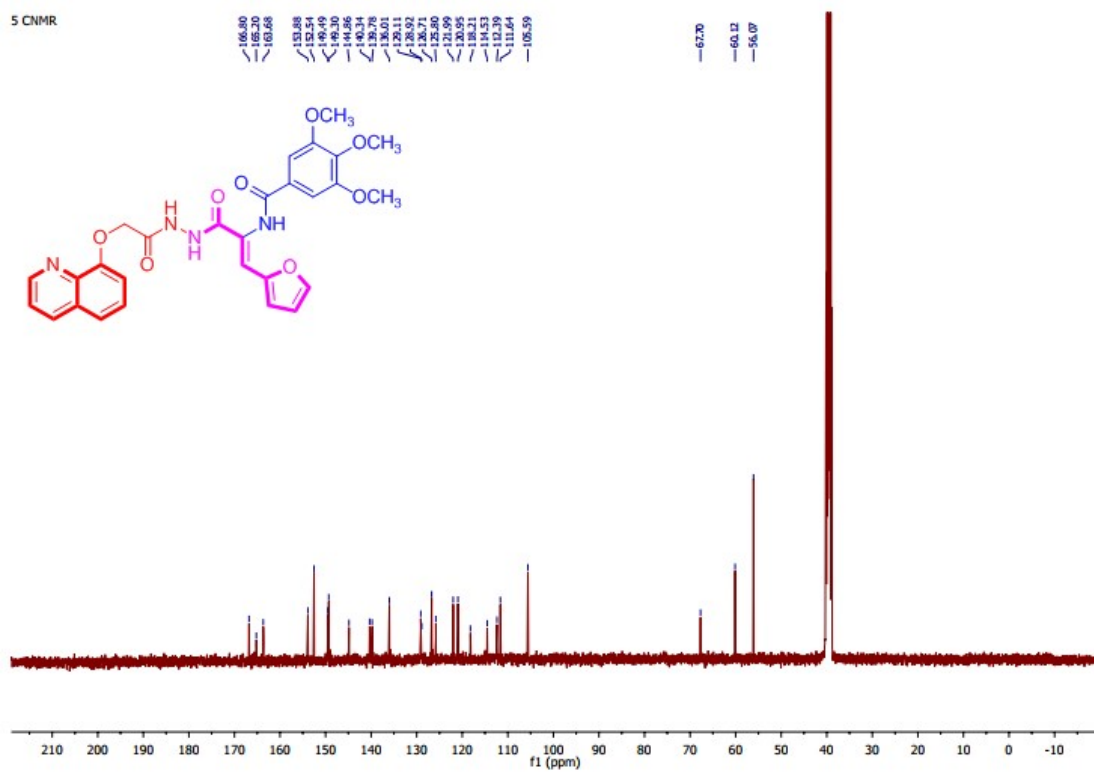

**Figure S2:**  $^{13}\text{C}$ -NMR spectrum of compound 5

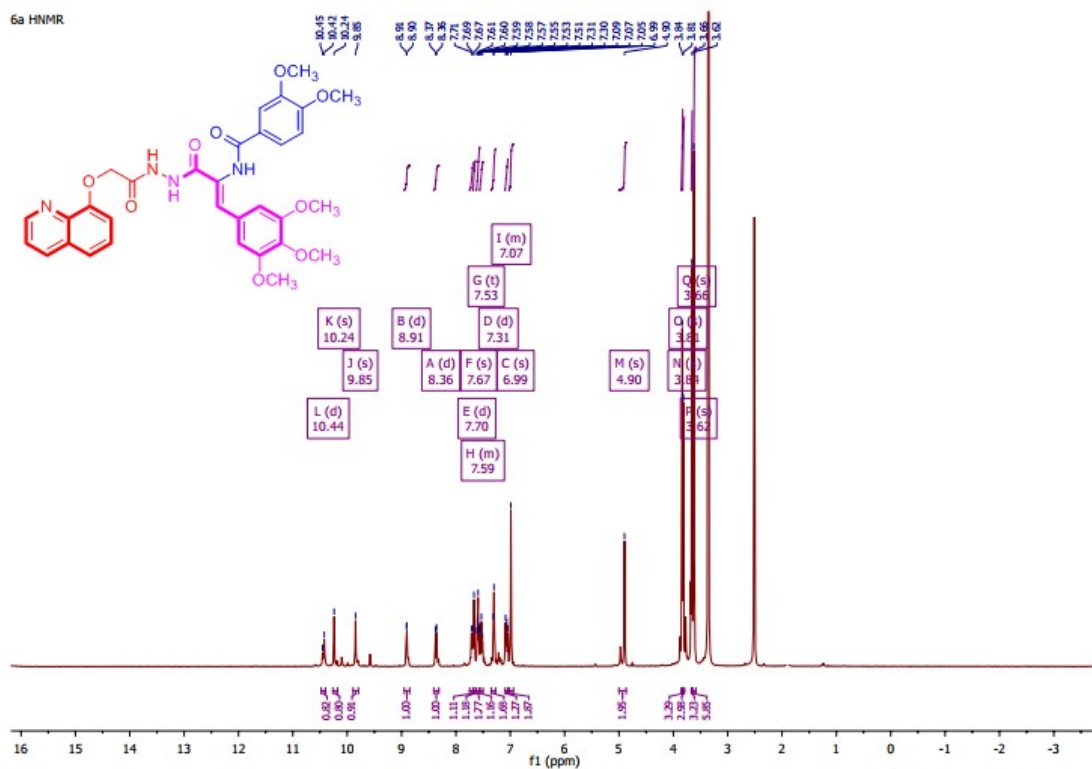

Figure S3:  $^1\text{H-NMR}$  spectrum of compound 6a

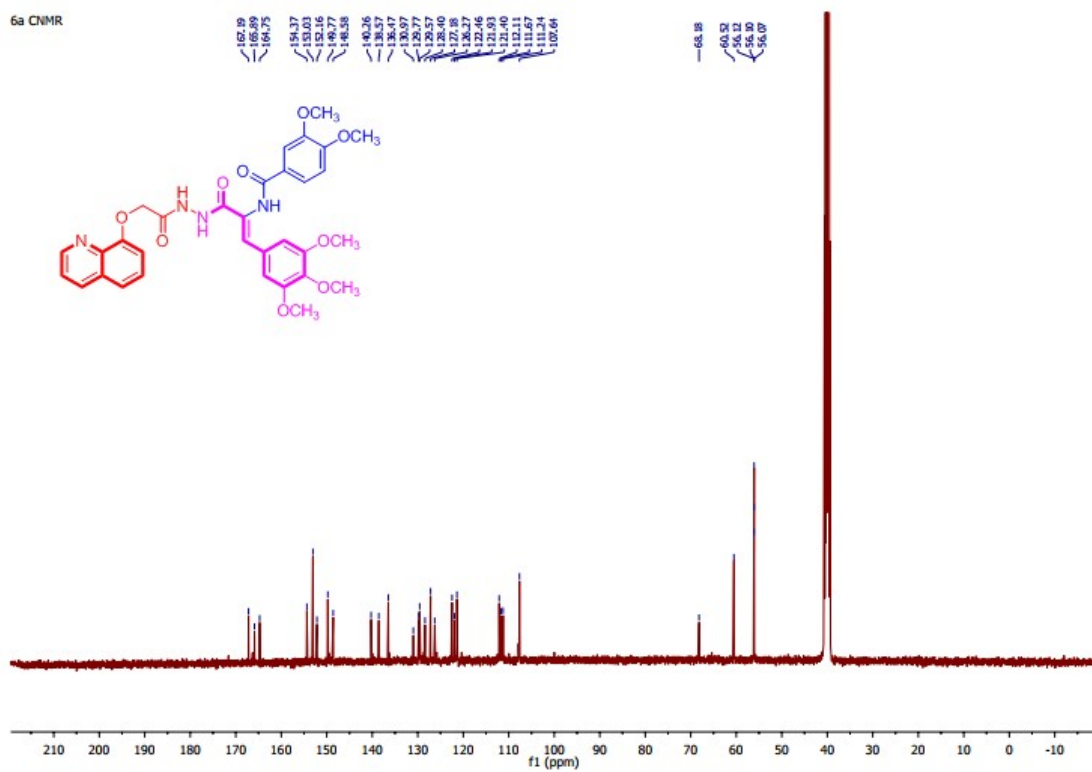

**Figure S4:**  $^{13}\text{C}$ -NMR spectrum of compound **6a**

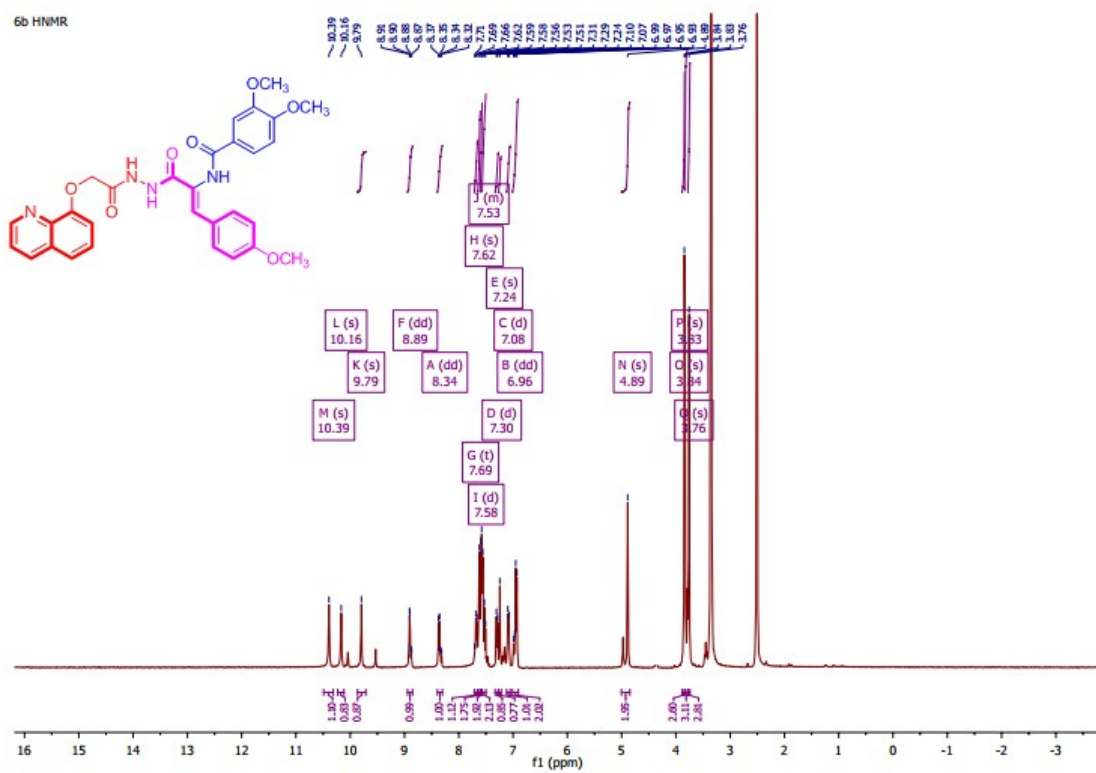

**Figure S5:**  $^1\text{H-NMR}$  spectrum of compound **6b**

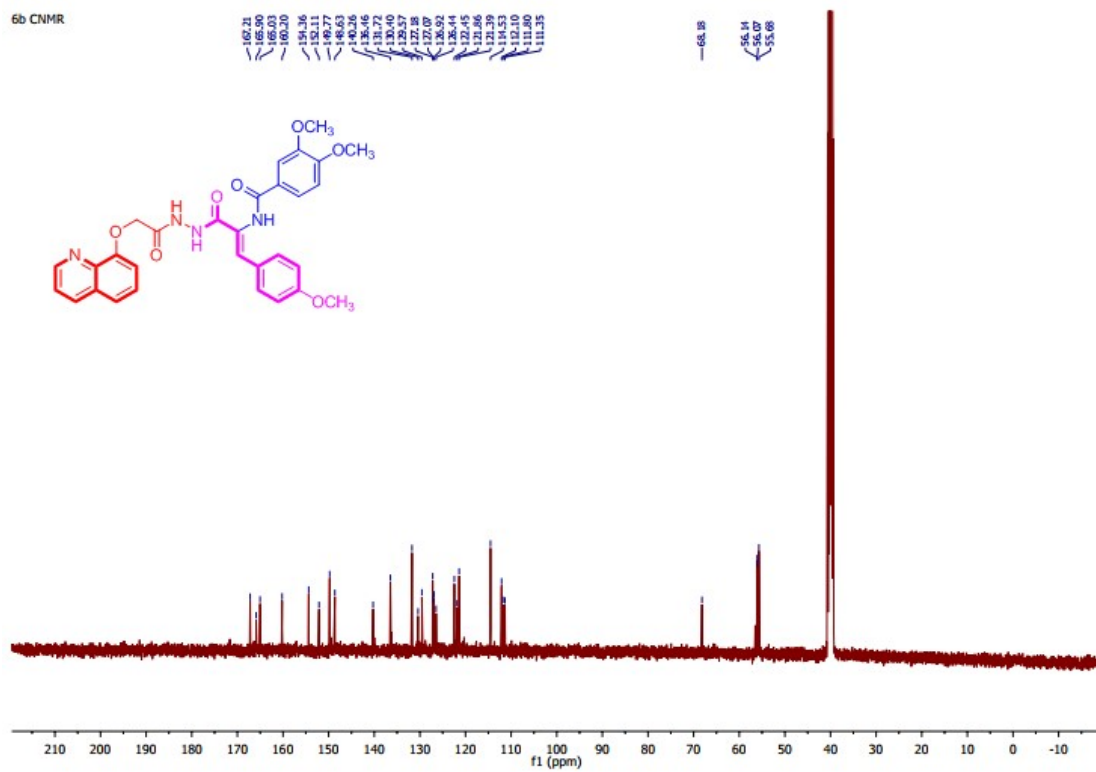

**Figure S6:**  $^{13}\text{C}$ -NMR spectrum of compound **6b**

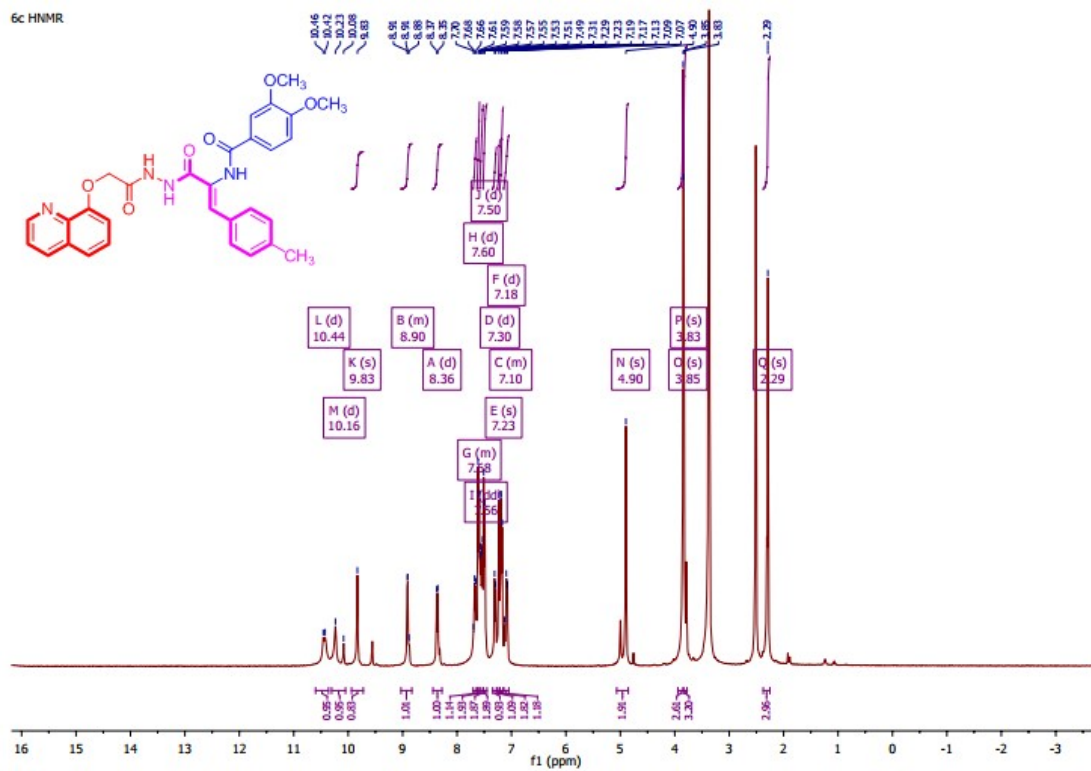

Figure S7:  $^1\text{H-NMR}$  spectrum of compound 6c



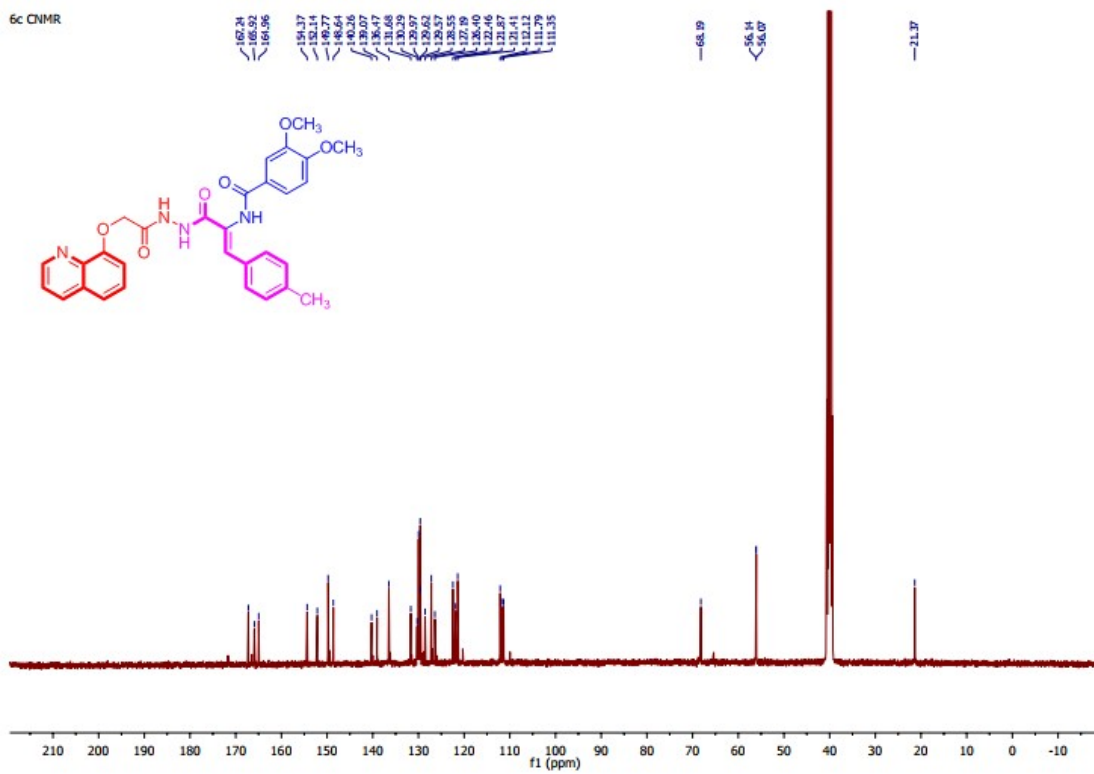

**Figure S8:** <sup>13</sup>C-NMR spectrum of compound 6c

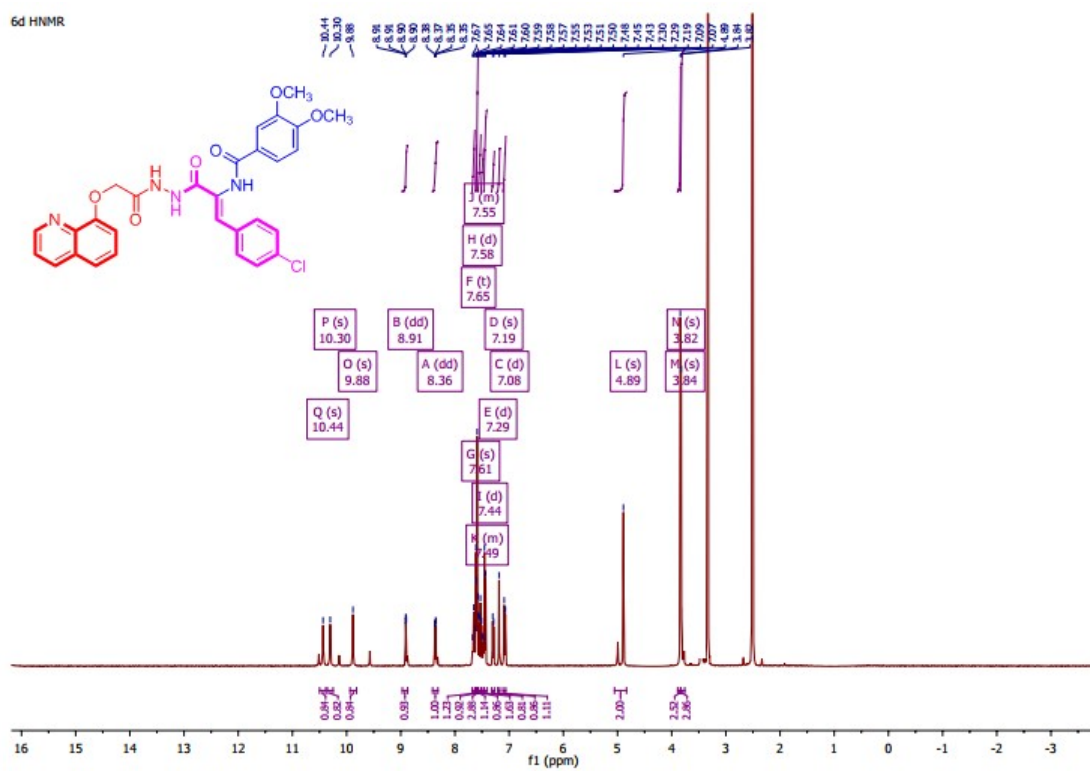

Figure S9:  $^1\text{H-NMR}$  spectrum of compound 6d

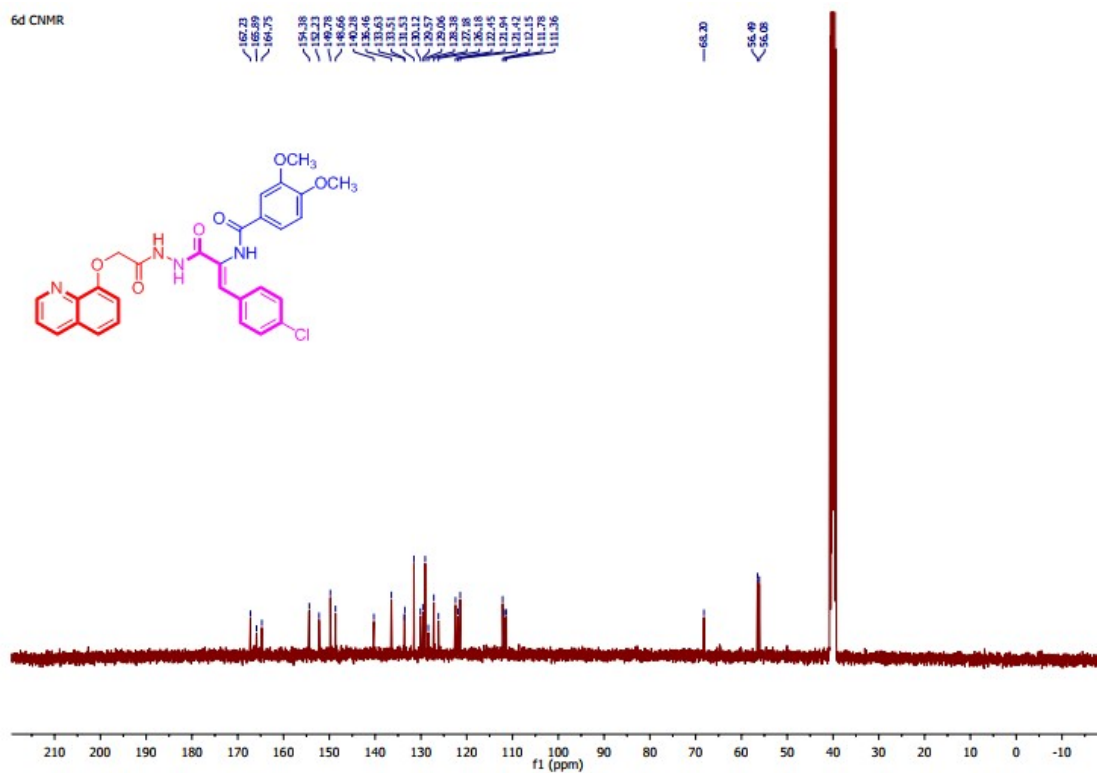

**Figure S10:**  $^{13}\text{C}$ -NMR spectrum of compound **6d**

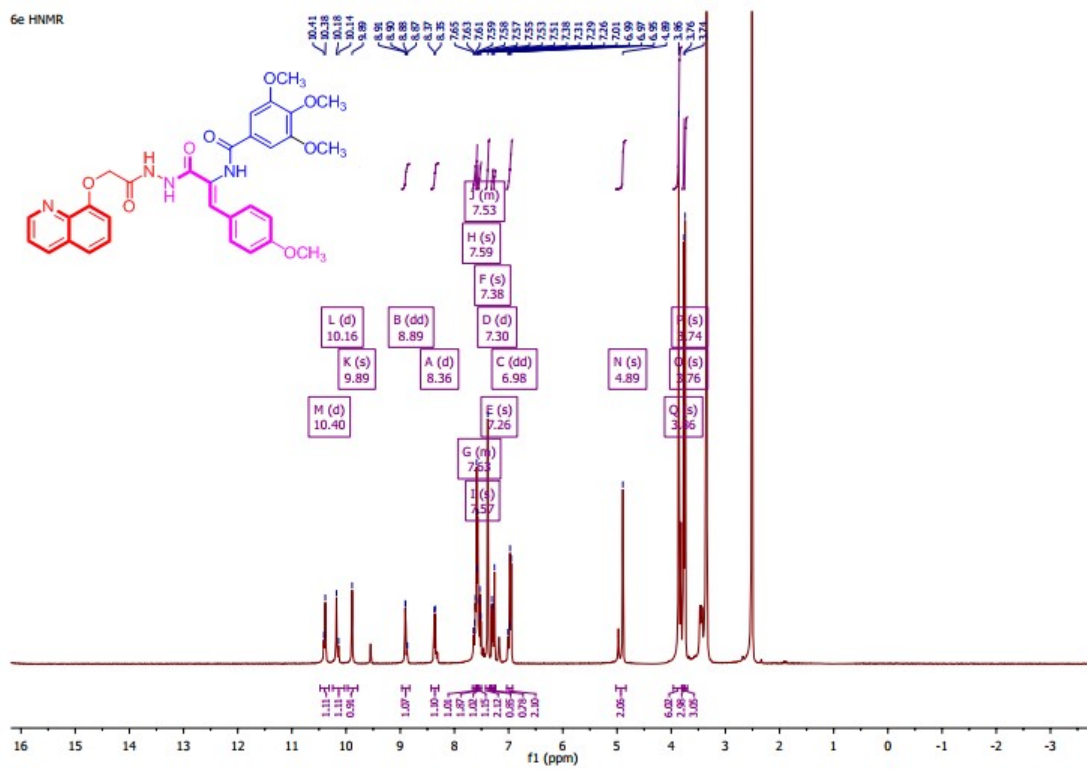

Figure S11:  $^1\text{H}$ -NMR spectrum of compound 6e

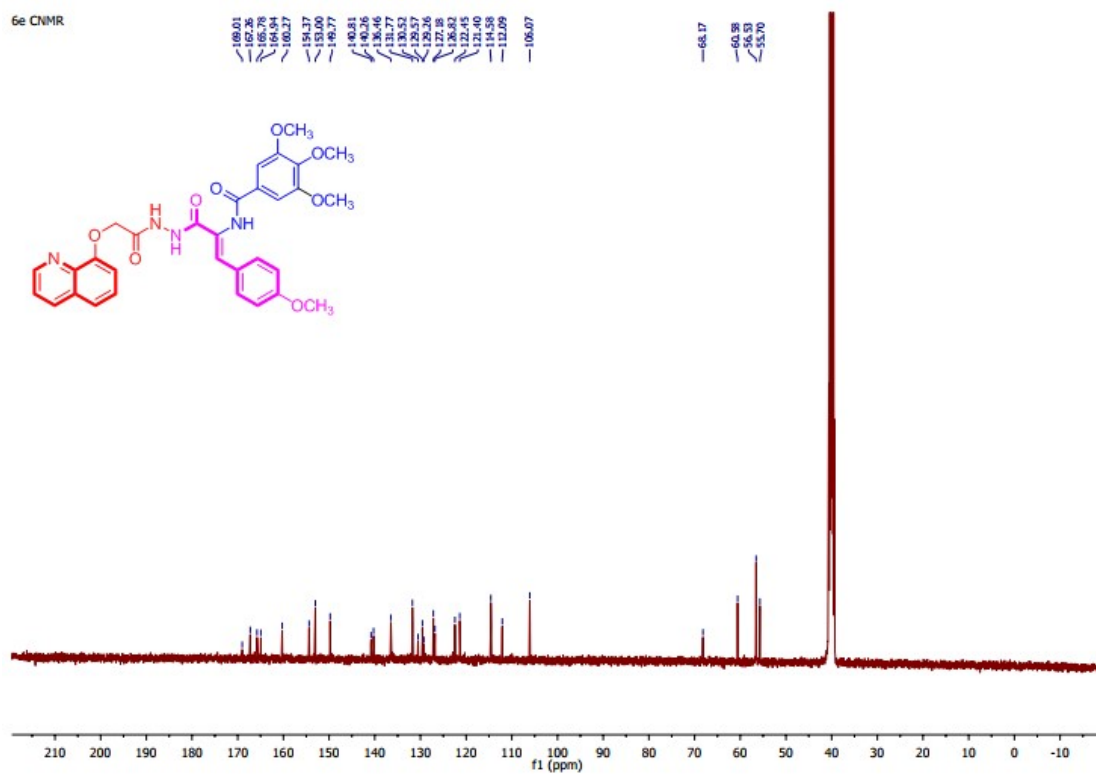

**Figure S12:**  $^{13}\text{C}$ -NMR spectrum of compound **6e**

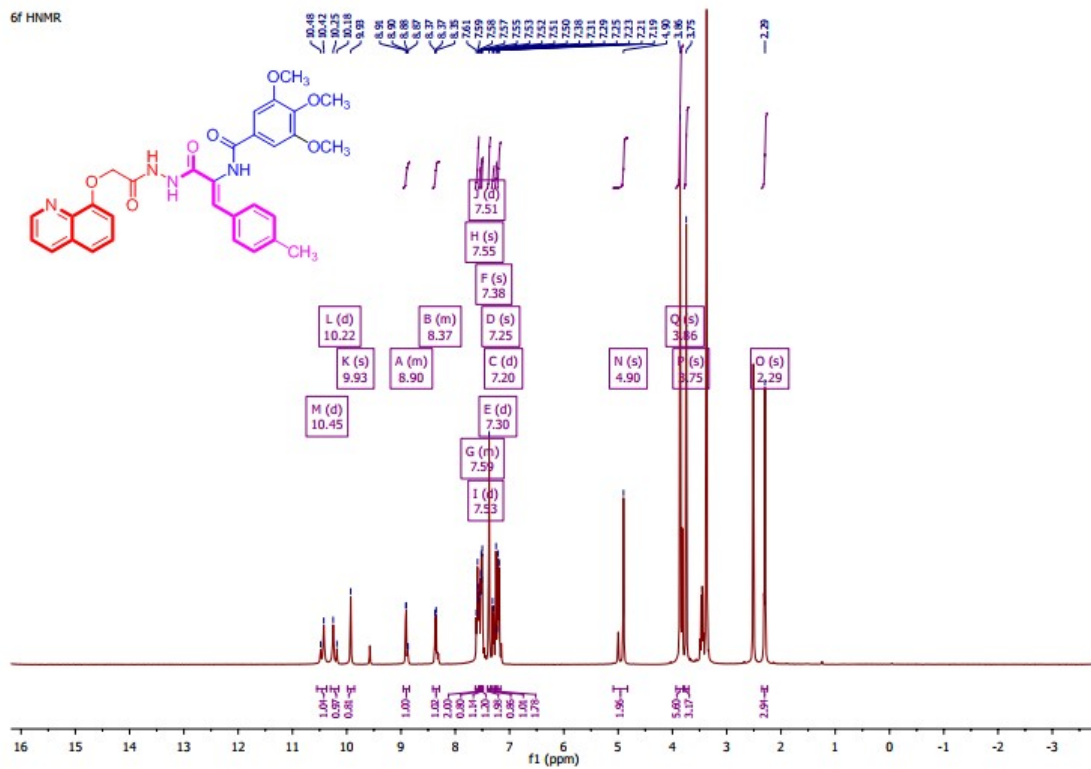

Figure S13:  $^1\text{H-NMR}$  spectrum of compound **6f**

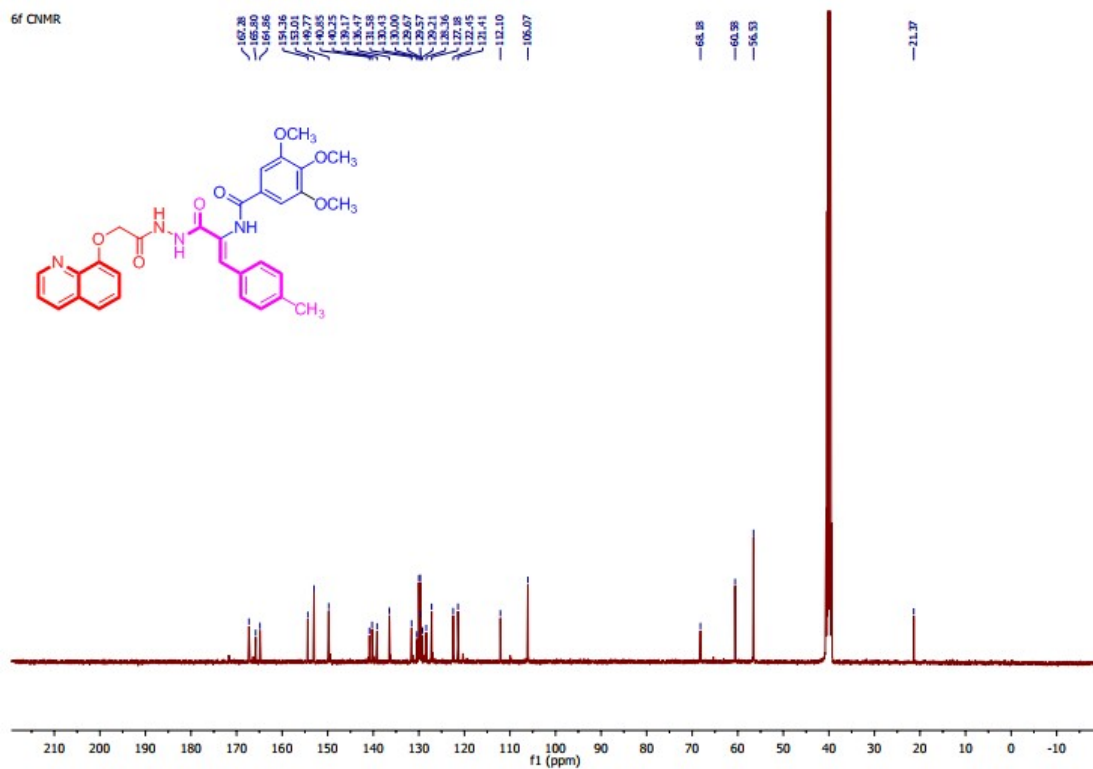

Figure S14:  $^{13}\text{C}$ -NMR spectrum of compound 6f

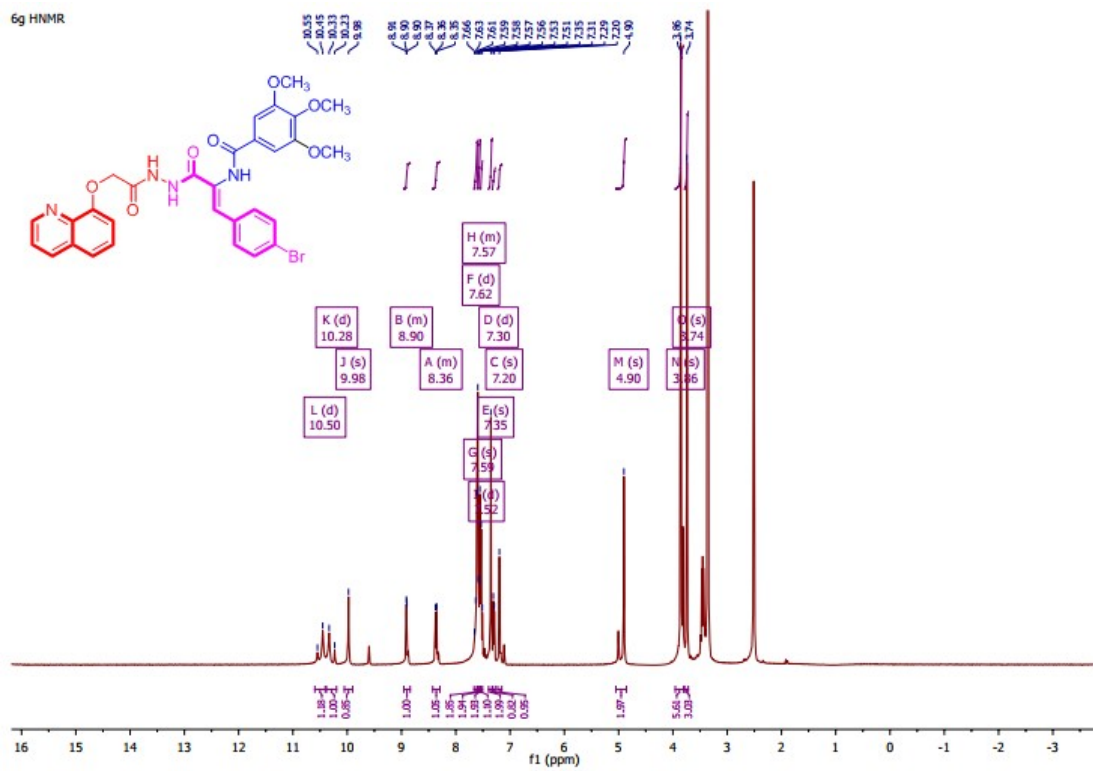

Figure S15: <sup>1</sup>H-NMR spectrum of compound 6g



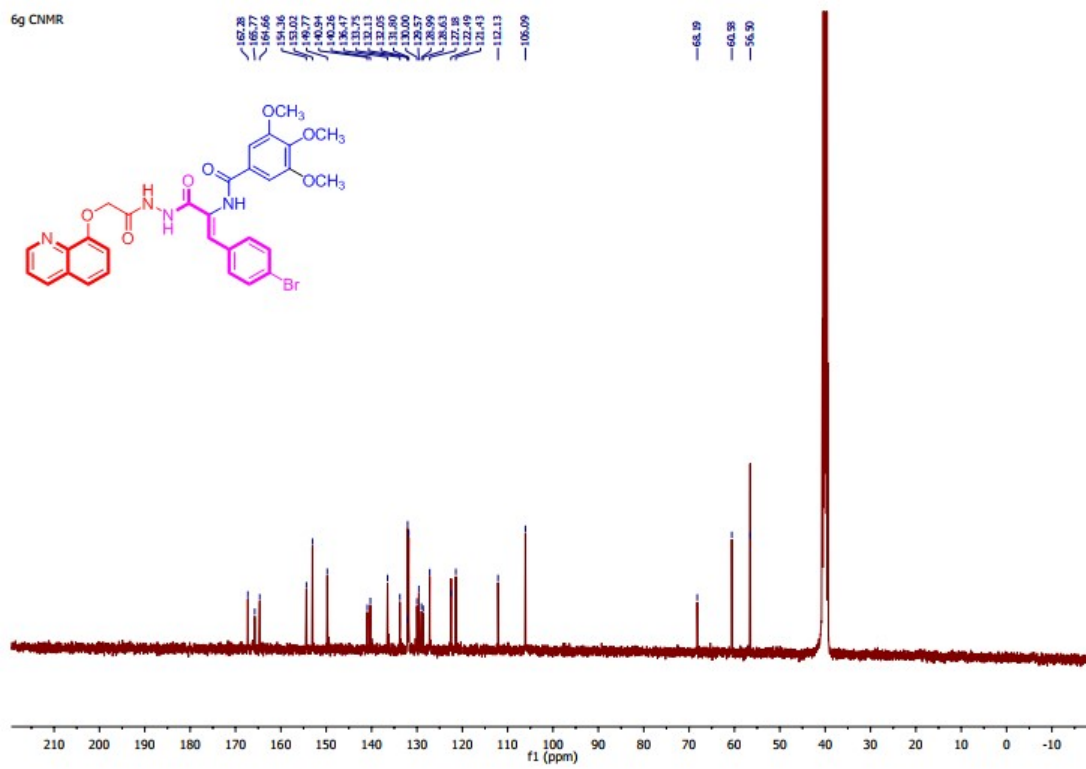

**Figure S16:**  $^{13}\text{C}$ -NMR spectrum of compound **6g**

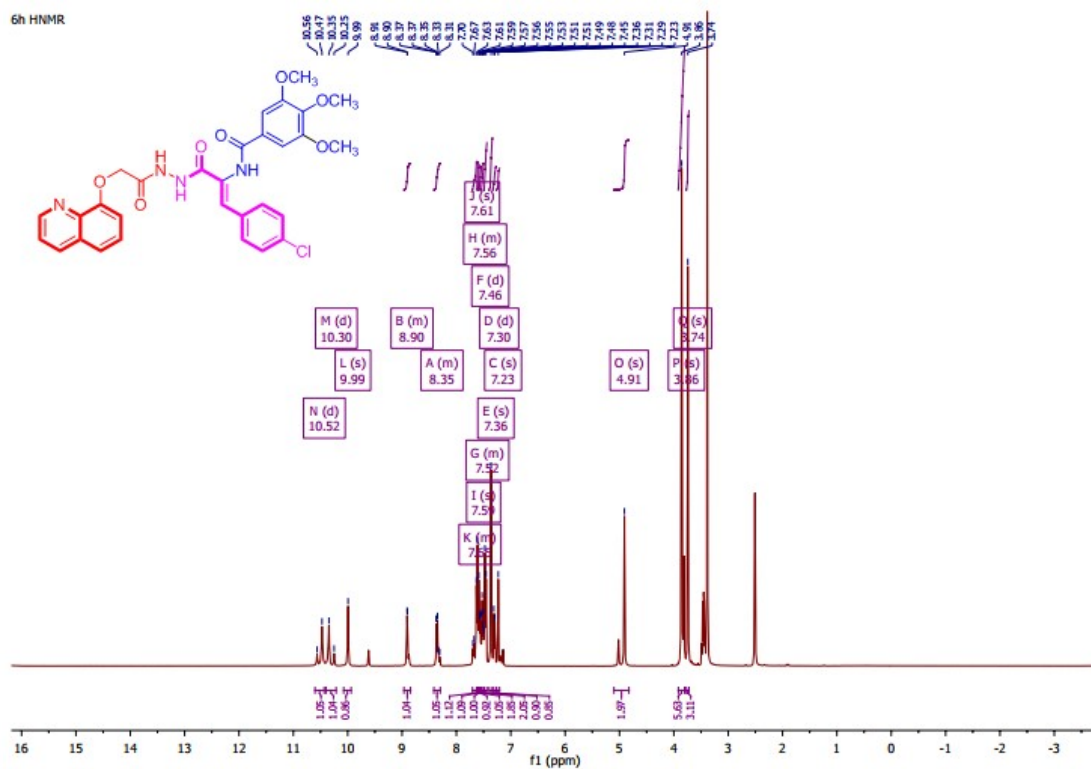

Figure S17:  $^1\text{H}$ -NMR spectrum of compound 6h

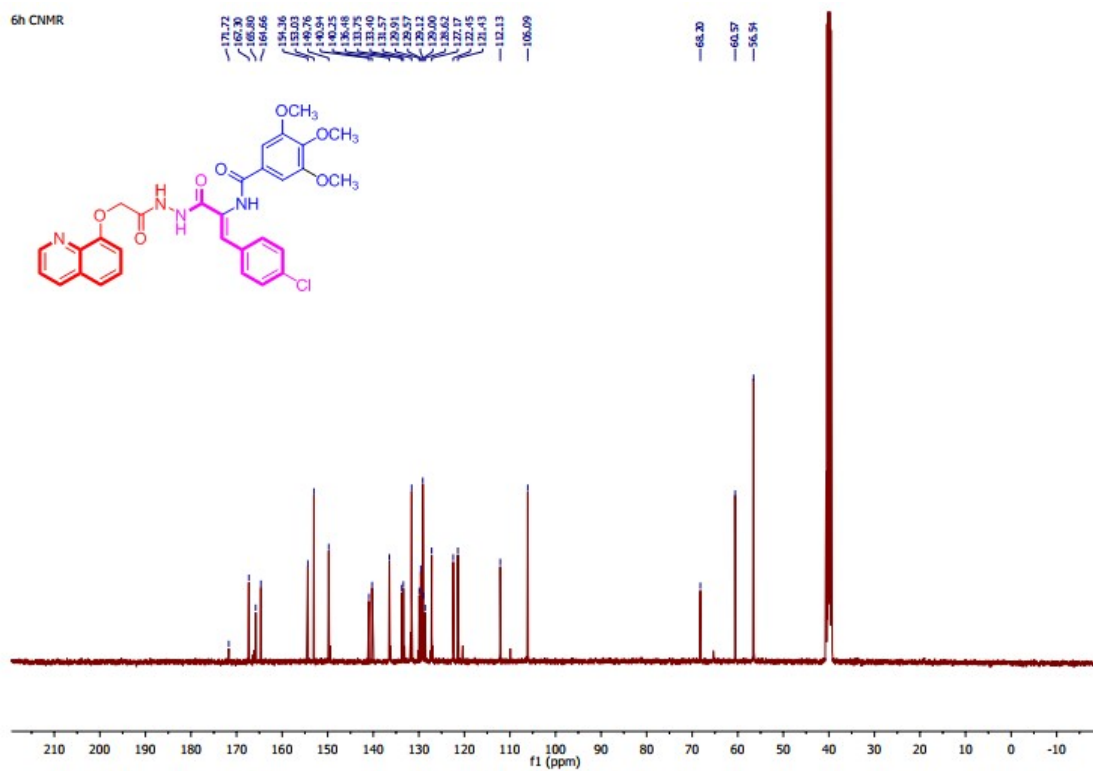

**Figure S18:**  $^{13}\text{C}$ -NMR spectrum of compound **6h**

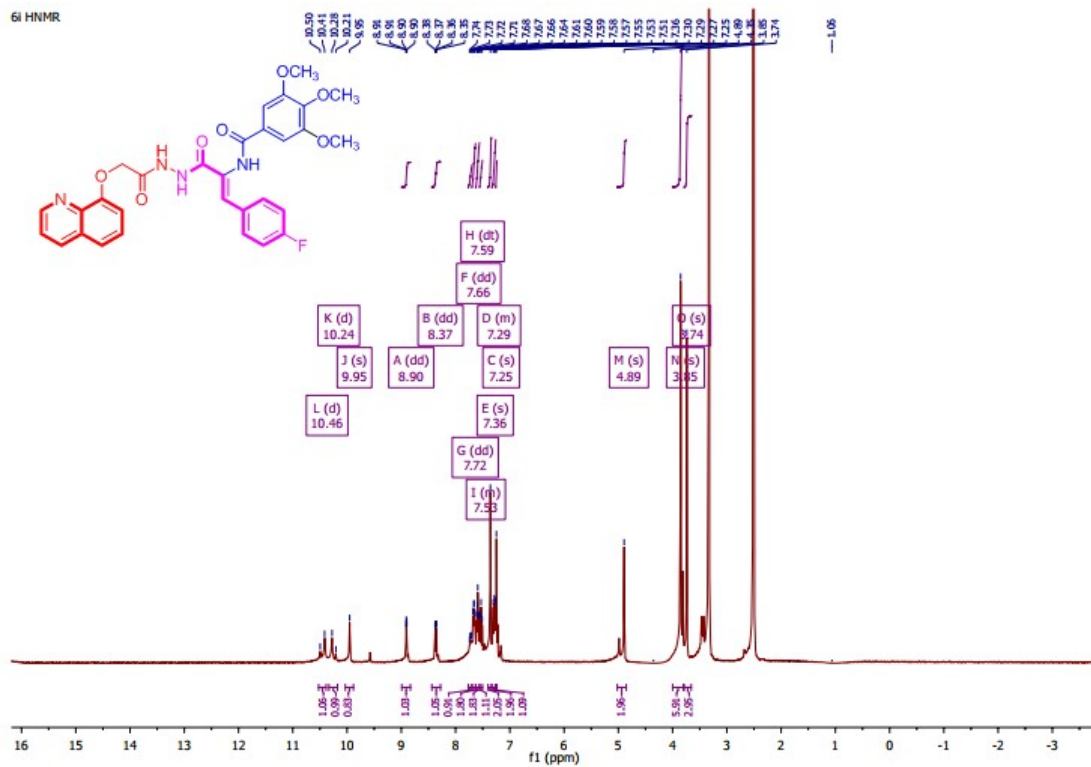

**Figure S19:** <sup>1</sup>H-NMR spectrum of compound **6i**

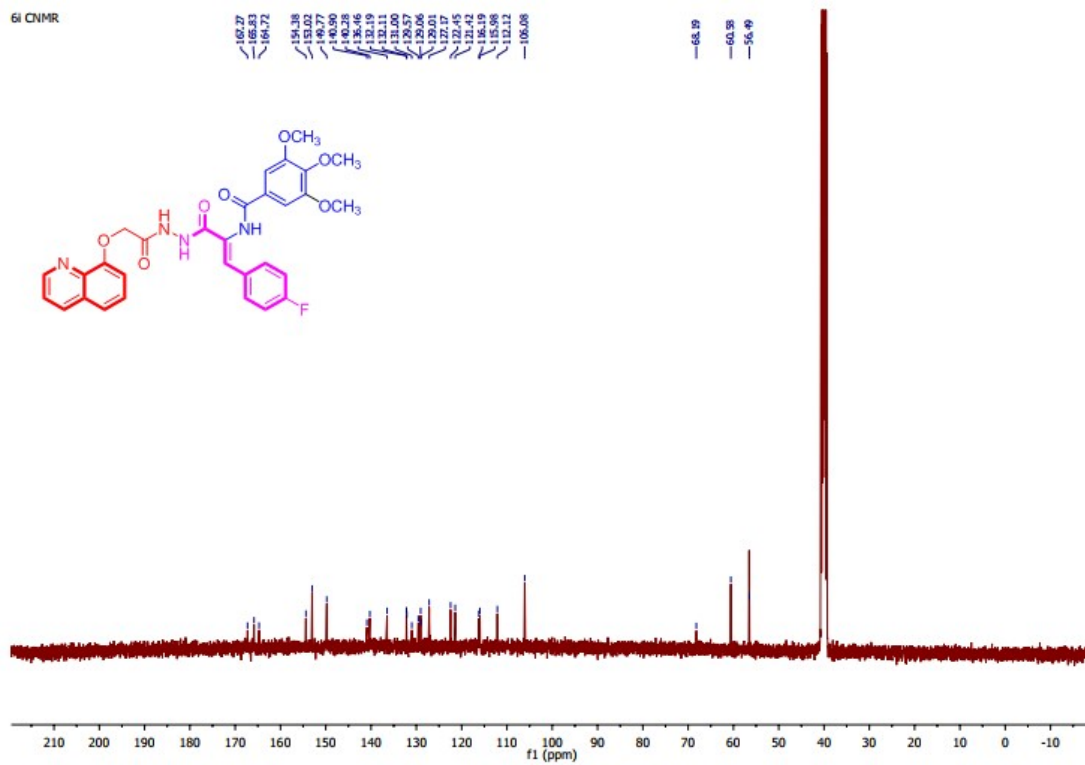

**Figure S20:**  $^{13}\text{C}$ -NMR spectrum of compound **6i**

## Appendix A

### S4.2. Biological Studies

#### S4.2.1. Cytotoxic activity evaluation

To measure the cytotoxic activity of the synthesized quinolin-8-yloxy-cinnamide Hybrids **5** and **6a-i** in liver (HepG2) cell line. Cell viability assay was assessed using MTT assay method. Cells at density of  $1 \times 10^4$  were seeded in a 96-well plate at 37 °C for 24 h under 5% CO<sub>2</sub>. After incubation, the cells were treated with different concentrations of the test quinoline cinnamide derivatives **5** and **6a-i** and incubated for 24 h, then 20 µl of MTT solution at 5 mg/mL was applied and incubated for 4 h at 37 °C. Dimethyl sulphoxide (DMSO) in volume of 100 µl was added to each well to dissolve the purple formazan that had formed. The color intensity of the formazan product, which represents the growth condition of the cells, is quantified by using an ELISA plate reader (EXL 800, USA) at 570 nm absorbance. The experimental conditions were carried out with at least three replicates, and the experiments were repeated at least three times.

#### S4.2.2. Tubulin polymerization Assay

Compound **6e** and colchicine (Col) were evaluated for their tubulin inhibitory activity according to manufacturer's instructions using # abcam Human Beta-tubulin simplestep ELISA Kit ab245722.

# ab245722

## Human Beta-Tubulin

### SimpleStep ELISA® Kit

For the quantitative measurement of Beta-Tubulin in human cell and tissue homogenate extract samples.

This product is for research use only and is not intended for diagnostic use.

#### **S4.2.3. Cell cycle analysis of compound 6e**

Cell cycle analysis in HepG2 cells was investigated using fluorescent Annexin V-FITC/ PI detection kit (*BioVision* EZCell™ Cell Cycle Analysis Kit Catalog #K920) by flow cytometry assay. HepG2 cells at a density of  $2 \times 10^5$  per well were harvested and washed twice in PBS. After that, the cells were incubated at 37 °C and 5% CO<sub>2</sub>. The medium was incubated with the tested compound **6e** at the IC<sub>50</sub> (μM) for 48 h, washed twice in PBS, fixed with 70% ethanol, rinsed again with PBS. Afterward, medium was stained with DNA fluorochrome PI for 15 min at 37 °C. The samples were immediately analyzed using FACS Calibur flow cytometer (Becton and Dickinson, Heidelberg, Germany).

#### **S4.2.4. Apoptosis assay for compound 6e**

Apoptosis in HepG2 cells was investigated using fluorescent Annexin V-FITC/ PI detection kit (*BioVision* Annexin V-FITC Apoptosis Detection Kit, Catalog #: K101) by flow cytometry assay. HepG2 cells at a density of  $2 \times 10^5$  per well were treated

with compound **6e** at the  $IC_{50}$  ( $\mu M$ ) for 48 h, then the cells were harvested and stained with Annexin V-FITC/ PI dye for 15 min in the dark at 37 °C. The samples were immediately analyzed using *FACS Calibur* flow cytometer (Becton and Dickinson, Heidelberg, Germany).
